# Supplementary material for: Paternally Expressed Gene 10 (PEG10) Promotes Growth, Invasion, and Survival of Bladder Cancer
Source: Oxford University Press journal article supplement (doi:10.1158/1535-7163.mct-19-1031), 2020-08-26
Supplement: 15357163mct191031-sup-231654_4_supp_6396389_qcsxpg.xlsx [file 15357163mct191031-sup-231654_4_supp_6396389_qcsxpg.xlsx]

## Sheet: Sheet1
Supplementary Table 2. Probes used in the PCR assays in this study
Taqman Gene Expression Assays	Life Technologies Catalog #
PEG10	Hs01122880_m1
GAPDH	Hs02758991_g1
TP53	Hs01034249_m1
