# Supplementary material for: Paternally Expressed Gene 10 (PEG10) Promotes Growth, Invasion, and Survival of Bladder Cancer
Source: Oxford University Press journal article supplement (doi:10.1158/1535-7163.mct-19-1031), 2020-08-26
Supplement: 15357163mct191031-sup-231654_4_supp_6396390_qcsxpg.xlsx [file 15357163mct191031-sup-231654_4_supp_6396390_qcsxpg.xlsx]

## Sheet: Sheet1
Supplementary Table S3. siRNA and plasmid used in this study
siRNA	Vendor	Catalog #
siPEG10#1	Life Technologies	4392420#s23005
siPEG10#2	Life Technologies	4392420#s23006
Scrambled control siCtrl	Life Technologies	4390846
Plasmid	Vendor	Plasmid #
pCMV-Neo-Bam p53 WT	addgene	16434
